# Supplementary material for: Porous LiMn2O4 as cathode material with high power and excellent cycling for aqueous rechargeable lithium batteries
Source: Royal Society of Chemistry journal article supplement (doi:10.1039/c0ee00673d), 2011-01-01
Supplement: c0ee00673d.pdf [file c0ee00673d.pdf]

† Electronic Supplementary Information (ESI):

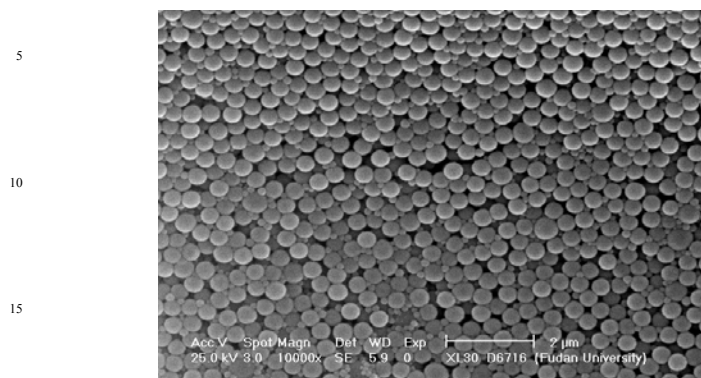

20 Fig. S1. Scanning electron micrograph of the PS template.

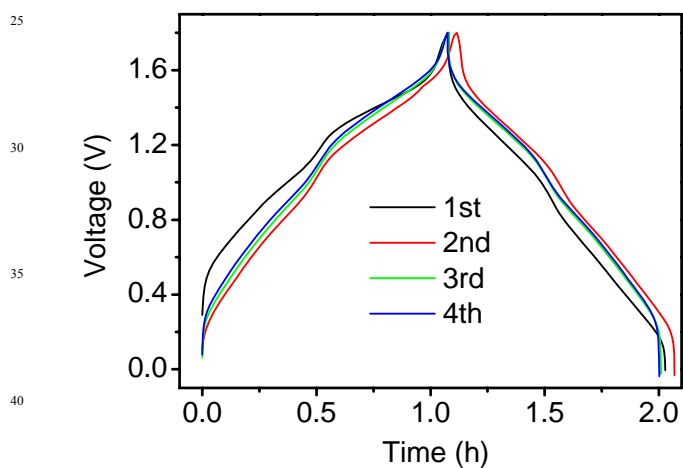

45 Fig. S2. Charge and discharge curve of activated carbon//porous  $\text{LiMn}_2\text{O}_4$  in the initial 4 cycles at the current density of  $100 \text{ mA g}^{-1}$ .

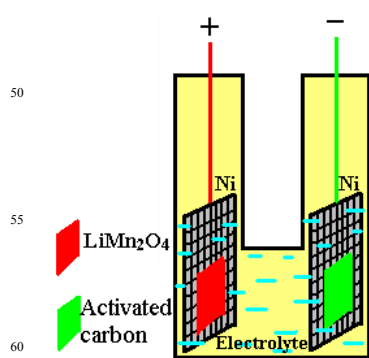

Fig. S3 The schematic figure of the two-electrode cell.
